# Supplementary material for: SARS–CoV–2 Spike Impairs DNA Damage Repair and Inhibits V(D)J Recombination In Vitro
Source: MDPI journal article supplement (doi:10.3390/v13102056), 2021-10-13
Supplement: s1 [file s1]

# Supplementary Information for

SARS-CoV-2 Spike impairs DNA damage repair and inhibits V(D)J recombination in vitro

**Authors:** Hui Jiang<sup>1,2\*</sup> and Ya-Fang Mei<sup>2\*</sup>

## **Affiliations:**

1. Department of Molecular Biosciences, The Wenner-Gren Institute, Stockholm University, SE-106 91 Stockholm, Sweden.
2. Department of Clinical Microbiology, Virology, Umeå University, SE-90185 Umeå, Sweden.

\*Correspondence: Hui Jiang ([hui.jiang@su.se](mailto:hui.jiang@su.se)) and Ya-Fang Mei ([ya-fang.mei@umu.se](mailto:ya-fang.mei@umu.se))

## **This PDF file includes:**

Figures S1 to S5

## **Supplementary Figures**

**A**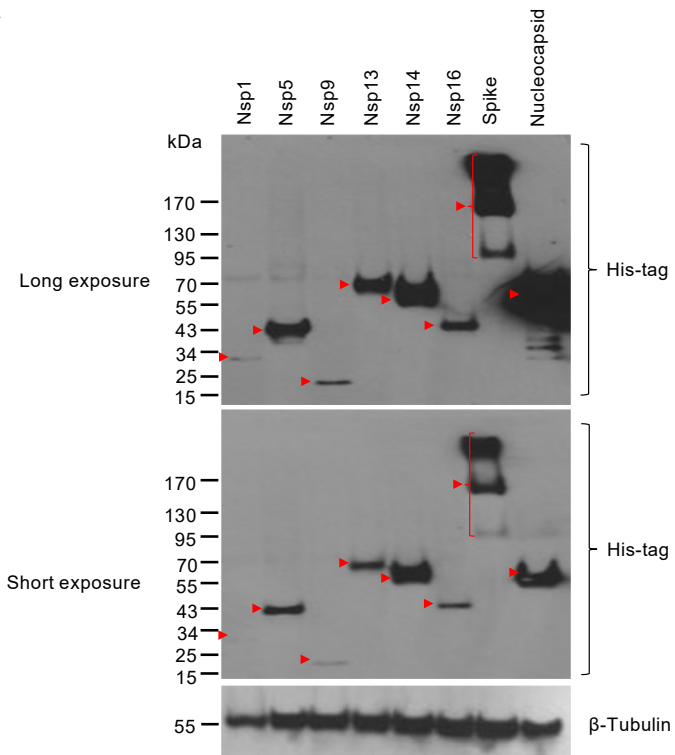

**Figure S1. Expression of nuclear localized SARS-CoV-2 proteins in human cells.**

(A). Overexpression of individual SARS-CoV-2 protein with His-tagged in HEK293T cells. Cells were lysed for western blotting 24hr post-transfection using anti-His tag antibodies. Red arrows indicate the individual protein.

**A**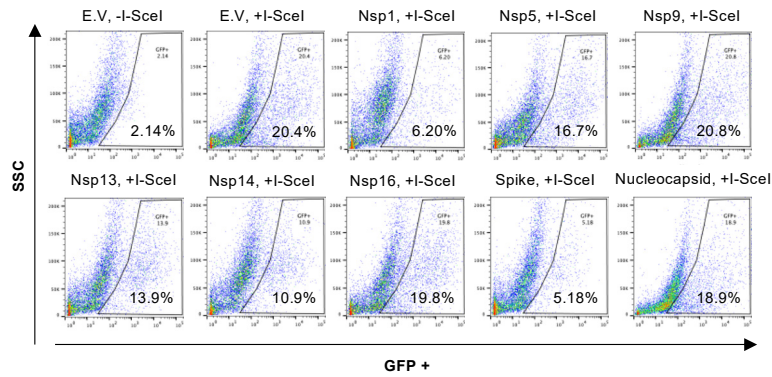**B**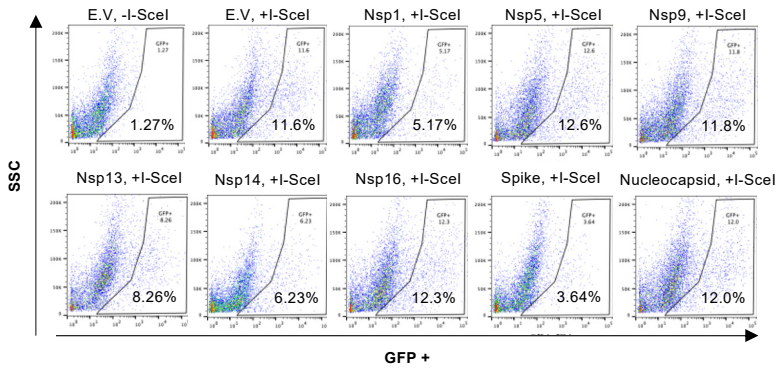**Figure S2. Effect of nuclear SARS-CoV-2 proteins on NHEJ- and HR- DNA repair pathway**

(A) EJ5-GFP-HEK293T cells with or without pCBASceI expression were transfected with empty vector (E.V) or individual SARS-CoV-2 protein expression vectors. After 48 h, the cells were analyzed for GFP-positive cells by flow cytometry to demonstrate the repair efficiency of NHEJ.

(B) DR-GFP-HEK293T cells with or without pCBASceI expression were transfected with empty vector (E.V) or individual SARS-CoV-2 protein. After 48 h, the cells were analyzed for GFP-positive cells by flow cytometry to demonstrate the repair efficiency of homologous recombination.

This figure related to **Fig1C, E**.

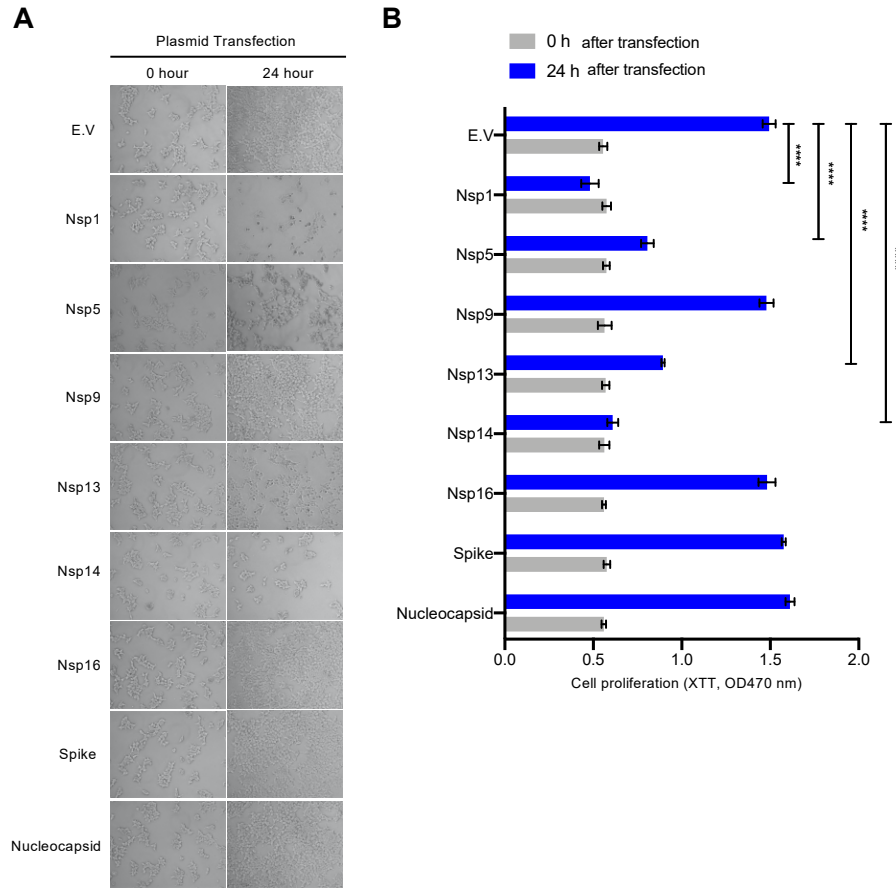

**Figure S3. Nsp1, Nsp5, Nsp13, Nsp14 but not spike inhibit cell proliferation**

(A) Bright-field microscopy of individual SARS-CoV-2 protein transfected HEK293T cells. (B) Analysis the effect of individual SARS-CoV-2 proteins on cell proliferation via XTT assay. Data are presented as mean  $\pm$  s.d. of  $n=3$  independent experiments. Statistical significance was assessed using one-way ANOVA test. \*\*\*\* $p<0.0001$ .

**A**

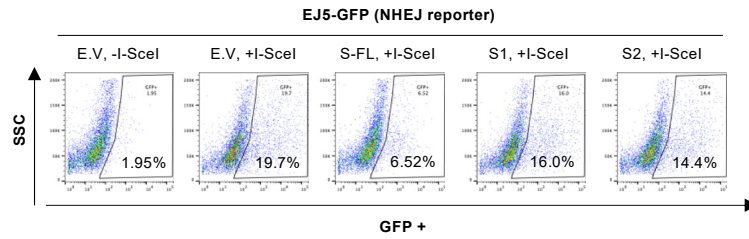

**B**

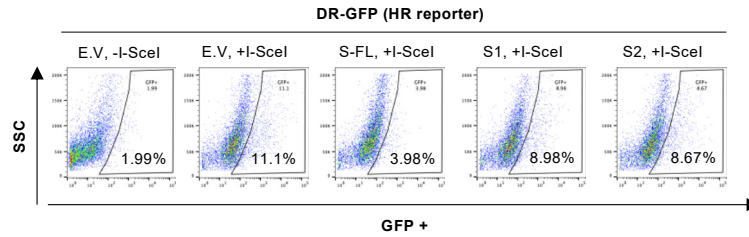

**Figure S4. Effect of SARS-CoV-2 spike mutants on NHEJ- and HR- DNA repair pathway.**

(A) Analysis effect of SARS-CoV-2 spike mutants on NHEJ repair by using EJ5-GFP reporter assay. (B) Analysis effect of SARS-CoV-2 spike mutants on HR repair by using DR-GFP reporter assay. This figure related to **Fig2D, E**.

**A**

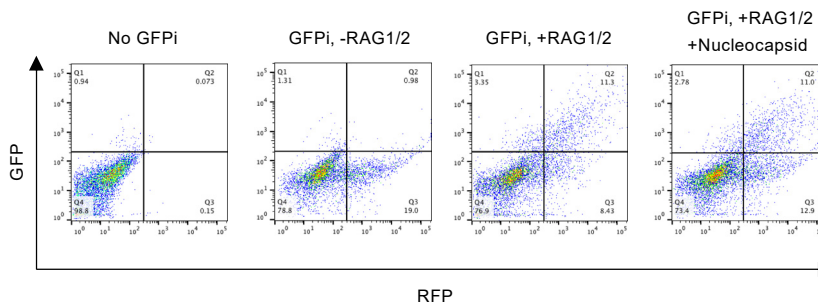

**Figure S5. In vitro V(D)J recombination assay**

(A) GFP/RFP flow cytometry analysis of a representative in vitro V(D)J recombination assay. This figure related to **Figure 4**.
